# Supplementary material
Source: ML conference proceedings conference paper supplement (https://openaccess.thecvf.com/content/ICCV2023/html/Liu_Multi-Modal_Neural_Radiance_ICCV_2023_paper.html)
Supplement: Supplementary file 1 [file Liu_Multi-Modal_Neural_Radiance_ICCV_2023_supplemental.zip]

Archive with 2 entries (2 files):
- 05824-supp.mp4
- 05824-supp.pdf
